# Supplementary material for: Rapid detection of Saccharomyces cerevisiae with boronic acid-decorated multivariate metal–organic frameworks and aptamers
Source: Royal Society of Chemistry journal article supplement (doi:10.1039/d3an00835e), 2023-01-01
Supplement: d3an00835e1.pdf [file d3an00835e1.pdf]

## Electronic supplementary information

### **Rapid detection of *Saccharomyces cerevisiae* with Boronic Acid-Decorated Multivariate Metal-Organic Frameworks and Aptamer**

Mengjing Teng <sup>a,c</sup>, Mengdi Hao <sup>b</sup>, Chuanfan Ding <sup>b</sup>, Li Wang <sup>a,c</sup>, Hao Shen <sup>b,\*</sup>, Shaoning Yu <sup>b</sup>,  
Liangqiang Chen <sup>a,c,\*</sup>, and Fan Yang <sup>a,c\*</sup>

<sup>a</sup> *Kweichow Moutai Group, Renhuai, Guizhou 564501, China.*

<sup>b</sup> *Institute of Mass Spectrometry, School of Material Science and Chemical Engineering, Ningbo University, Ningbo, Zhejiang 315211, China.*

<sup>c</sup> *Key Laboratory of Industrial Microbial Resources Development, Kweichow Moutai Co., Ltd, Renhuai, Guizhou 564501, China.*

\*Corresponding authors.

Email address: shenhao@nbu.edu.cn (for H.S.), chenliangqiang123@126.com (for L.C.) and yangfanmt@189.cn (for F.Y.).

Tel: +86-574-87609578

### **Aptamer screening**

A toggle-cell systematic evolution of ligands by exponential enrichment (SELEX) method was used to select aptamer for *S. cerevisiae*. The specific steps include microbial isolation, DNA extraction and Sanger sequencing, pangenome analysis, sequential toggle-cell SELEX operation, PCR amplification and determination of binding affinity. The dissociation constants ( $K_d$ ) and maximum binding intensity ( $B_{max}$ ) of the aptamer used in this study were  $4.936 \pm 0.121$  nM and  $0.993 \pm 0.048$  nM, respectively, according to fluorometer analysis.

### **Direct detection of *S. cerevisiae* in distilled yeast samples**

Distilled yeast (10 g) was added to a triangular flask containing glass beads and 90 mL of sterile physiological saline and incubated for 30 min (160 rpm/min). The supernatant was gradiently diluted and the amount of *S. cerevisiae* detected using the proposed fluorescence method. For the counting method, the diluted microbial solution was placed on the sterile plate, mixed with Bengal red agar medium (cooled to 50°C), and cultivated at 28°C for 1 day. The counting range was 30-300.

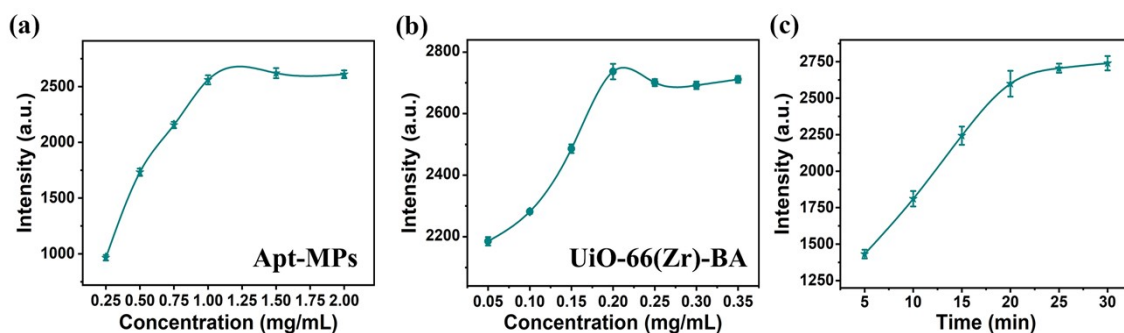

**Fig. S1** Optimization of the assay. (a) Concentration of Apt-MPs; (b) concentration of UiO-66(Zr)-BA; (c) incubation time.

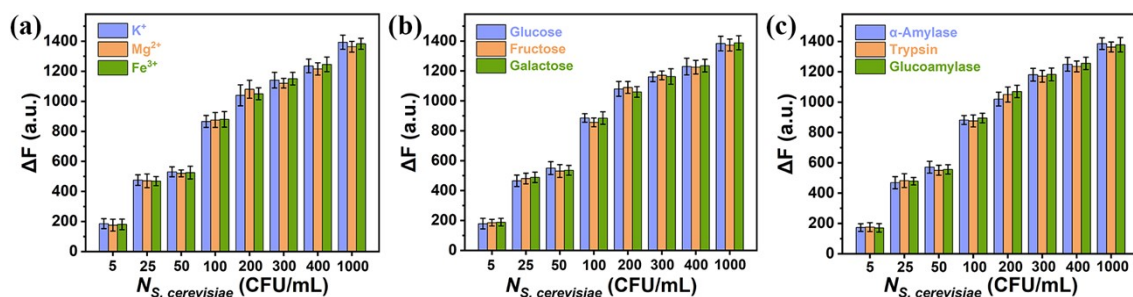

**Fig. S2** Susceptibility fluorescence tests with different concentrations of *S. cerevisiae* and metal ions ( $K^+$ ,  $Mg^{2+}$ , and  $Fe^{3+}$ , 100 mM) (a), small molecules (glucose, fructose, and galactose, 100 mM) (b), and proteins ( $\alpha$ -amylase, trypsin, and glucoamylase, 5 mg/mL) (c).

**Table S1** Comparison of the current approach to reported methods for *S. cerevisiae* analysis.

| Detection method       | Recognition component             | Linear range (CFU/mL)             | LOD (CFU/mL)    | Test time (h) | Ref.      |
|------------------------|-----------------------------------|-----------------------------------|-----------------|---------------|-----------|
| PCR                    | Specific primers                  | $3.8-3.8 \times 10^5$             | 3.8             | > 2           | [1]       |
| Optics                 | Silver sensitized by lectins      | $3.2 \times 10^3-7 \times 10^7$   | -               | > 1.5         | [2]       |
| qPCR                   | Taqman                            | $3.4 \times 10^2-3.4 \times 10^7$ | 78              | > 4           | [3]       |
| Cyclic voltammetry     | TTCC/GCE                          | $2 \times 10^4-10^8$              | $10^4$          | ~ 1           | [4]       |
| Impedance spectroscopy | MPA(SAM)/AuE                      | $10^2-10^8$                       | $10^2$          | ~ 1           | [5]       |
| Fluorescence           | Ionic liquid mediated carbon dots | $5 \times 10^2-1 \times 10^6$     | $5 \times 10^2$ | ~ 1.5         | [6]       |
| Fluorescence           | Fluorescence                      | $10-10^6$                         | 3               | ~ 0.5         | This work |

**Table S2** The intra-batch and inter-batch precision of the proposed biosensor for *S. cerevisiae* detection.

| <i>S. cerevisiae</i><br>(CFU/mL) | Intra-batch                           |             | Inter-batch                           |             |
|----------------------------------|---------------------------------------|-------------|---------------------------------------|-------------|
|                                  | Mean $\pm$ SD                         | CV (%; n=6) | Mean $\pm$ SD                         | CV (%; n=6) |
| 20                               | $18 \pm 1.0$                          | 5.6         | $22 \pm 1.0$                          | 4.5         |
| $10^2$                           | $9.7 \times 10 \pm 5.9$               | 6.1         | $1.1 \times 10^2 \pm 6.5$             | 5.9         |
| $10^4$                           | $1.0 \times 10^4 \pm 3.3 \times 10^2$ | 3.3         | $9.9 \times 10^3 \pm 1.8 \times 10^2$ | 1.8         |
| $10^6$                           | $9.8 \times 10^5 \pm 5.0 \times 10^4$ | 5.1         | $9.6 \times 10^5 \pm 7.1 \times 10^4$ | 7.4         |

**Table S3** Direct detection of *S. cerevisiae* in distilled yeasts.

|                   | Proposed method              |     | Counting method              |     |
|-------------------|------------------------------|-----|------------------------------|-----|
|                   | Mean                         | RSD | Mean                         | RSD |
|                   | ( $\times 10^3$ CFU/mL, n=5) | (%) | ( $\times 10^3$ CFU/mL, n=5) | (%) |
| Distilled yeast 1 | 2.45                         | 4.2 | 4.42                         | 12  |
| Distilled yeast 2 | 1.38                         | 5.5 | 3.91                         | 8.2 |
| Distilled yeast 3 | 3.24                         | 5.0 | 5.37                         | 9.6 |

## REFERENCES

- (1) P. Martorell; A. Querol; M. T. Fernandez-Espinar. Rapid identification and enumeration of *Saccharomyces cerevisiae* cells in wine by real-time PCR. *Appl. Environ. Microbiol.* **2005**, 71, 6823-6830.
- (2) Q.G. Gyurjyan; M.V. Mikaelyan; G.G. Poghosyan; V.A. Hovhannisyan; V, K. Gasparyan. Detection of *Saccharomyces cerevisiae* by silver nanoparticles sensitized with various lectins. *Anal. Methods* **2020**, 12, 3508-3512.
- (3) F. Salinas; D. Garrido; A. Ganga; G. Veliz; C. Martinez. Taqman real-time PCR for the detection and enumeration of *Saccharomyces cerevisiae* in wine. *Food Microbiol.* **2009**, 26, 328-332.
- (4) S. Han; X. Li; G. Guo; Y. Sun; Z. Yuan. Voltammetric measurement of microorganism populations. *Anal. Chim. Acta* **2000**, 405, 115-121.
- (5) H. Chen; C. Heng; P. Puiu; X. Zhou; A. Lee; T. Lim; S. Tan. Detection of *Saccharomyces cerevisiae* immobilized on self-assembled monolayer (SAM) of alkanethiolate using electrochemical impedance spectroscopy. *Analy. Chim. Acta* **2005**, 554, 52-59.
- (6) J. Wang; J. Teng; T. Jia; Y. Shu. Detection of yeast *Saccharomyces cerevisiae* with ionic liquid mediated carbon dots. *Talanta* **2018**, 178, 818-824.
